# Supplementary material for: POT1 and Damage Response Malfunction Trigger Acquisition of Somatic Activating Mutations in the VEGF Pathway in Cardiac Angiosarcomas
Source: PubMed Central journal article supplement — J Am Heart Assoc. 2019 Sep 12;8(18):e012875. doi: 10.1161/JAHA.119.012875 (PMC6818007; doi:10.1161/jaha.119.012875), 2019-09-12
Supplement: JAH3-8-e012875-s001.pdf [file JAH3-8-e012875-s001.pdf]

# **SUPPLEMENTAL MATERIAL**

**Table S1. Filtered somatic variants found in the WES of *POT1* p.Arg117Cys carriers, one CAS and one breast AS with papillary thyroid cancer.**

**Genes previously shown to be involved in the corresponding pathology are highlighted in grey.**

| Pathology | Chr         | Gene              | Position  | REF                                  | ALT   | ALT allele fraction | Amino acid change | dbSNP           | Cosmic                      | GMAF   | ExAC |
|-----------|-------------|-------------------|-----------|--------------------------------------|-------|---------------------|-------------------|-----------------|-----------------------------|--------|------|
| CAS       | 1           | <i>TMEM52</i>     | 1850627   | CAGCGGCAGG                           | C     | 0.224               | L26del            |                 | COSM1167507                 | -      | -    |
|           | 1           | <i>RCC1</i>       | 28858834  | G                                    | A     | 0.184               | G169Asp           | -               |                             | -      | -    |
|           | 1           | <i>CELSR2</i>     | 109792751 | T                                    | C     | 0.432               | L17P              | rs20027726<br>5 | COSM1200708                 | -      | -    |
|           | 1           | <i>NOTCH2</i>     | 120612234 | G                                    | C     | 0.234               | -                 | -               |                             | -      | -    |
|           | 1           | <i>NOTCH2NL</i>   | 145248838 | A                                    | G     | 0.232               | -                 | rs20120485<br>4 |                             | -      | -    |
|           | 1           | <i>ARNT</i>       | 150849103 | C                                    | A     | 0.165               | -                 | rs10305649      |                             | 0.0289 | 0.05 |
|           | 1           | <i>LOR</i>        | 153233990 | T                                    | G     | 0.212               | Y189D             | -               |                             | -      | -    |
|           | 2           | <i>NRXN1</i>      | 50765449  | C                                    | T     | 0.346               | W735*             | -               |                             | -      | -    |
|           | 2           | <i>ANKRD36</i>    | 97820478  | G                                    | A     | 0.432               | c.1260+3D         | rs79756591      | COSM1632174,<br>COSM1632175 | -      | -    |
|           | 2           | <i>RABL2A</i>     | 114386168 | C                                    | T     | 0.218               | -                 | -               |                             | -      | -    |
|           | 2           | <i>HS6ST1</i>     | 129075877 | G                                    | T     | 0.214               | D87E              | -               |                             | -      | -    |
|           | 2           | <i>HS6ST1</i>     | 129075939 | T                                    | A     | 0.168               | K67*              | rs20224738<br>7 | COSM1129578                 | -      | -    |
|           | 2           | <i>HOXD11</i>     | 176972061 | G                                    | C     | 0.344               | -                 | -               |                             | -      | -    |
|           | 2           | <i>SPATA3</i>     | 231861032 | TCAGCAGCCT<br>AGCCCTGAAT<br>CCACACCA | T     | 0.188               | Q30_Q38del        | rs72362780      | COSM1406147                 | -      | -    |
|           | 2           | <i>NGEF</i>       | 233748132 | C                                    | T     | 0.234               | R549H             | -               |                             | -      | -    |
|           | 3           | <i>FANCD2</i>     | 10088266  | G                                    | T     | 0.434               | c.1137G>T+3D      | rs72492997      |                             | -      | -    |
|           | 4           | <b><i>KDR</i></b> | 55968550  | CATT                                 | C     | 0.424               | N704del           | -               |                             | -      | -    |
|           | 4           | <i>ALB</i>        | 74280882  | G                                    | A     | 0.546               | V397M             | -               |                             | -      | -    |
| 4         | <i>DSPP</i> | 88537069          | T         | TGATA<br>GCAGC                       | 0.288 | S1085_insDSS        | -                 |                 | -                           | -      |      |

|    |                 |           |                                                  |   |       |               |                 |                                             |       |   |
|----|-----------------|-----------|--------------------------------------------------|---|-------|---------------|-----------------|---------------------------------------------|-------|---|
| 4  | <i>CENPE</i>    | 104119549 | G                                                | C | 0.212 | -             | -               | -                                           | -     |   |
| 4  | <i>SYNPO2</i>   | 119951749 | C                                                | T | 0.188 | R607*         | -               | -                                           | -     |   |
| 4  | <i>CBR4</i>     | 169931326 | CA                                               | C | 0.434 | -             | rs67305871      | -                                           | -     |   |
| 6  | <i>ATAT1</i>    | 30595639  | G                                                | C | 0.465 | G79A          | -               | -                                           | -     |   |
| 6  | <i>HLA-DRB5</i> | 32497905  | G                                                | A | 0.365 | R33*          | rs71549219      | -                                           | -     |   |
| 6  | <i>HBS1L</i>    | 135290447 | T                                                | G | 0.345 | E609D         | -               | -                                           | -     |   |
| 7  | <i>ZAN</i>      | 100385561 | GGCTTCAGCT<br>ACCGCTTGCA<br>AGGCCGCATG<br>ACCTAT | G | 0.208 | F2344SfsTer10 | rs72364644      | COSM1329481,<br>COSM1329482,<br>COSM1329483 | -     | - |
| 7  | <i>TRBV5-5</i>  | 142148969 | A                                                | T | 0.498 | L101*         | -               | -                                           | -     |   |
| 10 | <i>ARMC4</i>    | 28250610  | C                                                | A | 0.370 | D425Y         | -               | -                                           | -     |   |
| 10 | <i>FGFR2</i>    | 123325217 | C                                                | T | 0.430 | c.111-1       | -               | -                                           | -     |   |
| 11 | <i>MUC6</i>     | 1030228   | A                                                | C | 0.708 | C334G         | rs20098033<br>0 | COSM1603961,<br>COSM1603962                 | -     | - |
| 11 | <i>CLCF1</i>    | 67141148  | AT                                               | A | 0.278 | -             | -               | -                                           | -     |   |
| 11 | <i>PDE2A</i>    | 72301235  | CGT                                              | C | 0.234 | Y252SfsTer74  | -               | -                                           | -     |   |
| 12 | <i>DDX11</i>    | 31237978  | C                                                | T | 0.188 | R186W         | rs74087925      | -                                           | -     |   |
| 12 | <i>PRKAG1</i>   | 49397570  | C                                                | A | 0.234 | V234F         | -               | -                                           | -     |   |
| 12 | <i>KMT2D</i>    | 49434325  | G                                                | A | 0.436 | R2410*        | -               | COSM144609,<br>COSM1299436                  | -     | - |
| 12 | <i>KMT2D</i>    | 49444088  | GGA                                              | G | 0.298 | L1094PfsTer20 | -               | -                                           | -     |   |
| 14 | <i>ZFP36L1</i>  | 69256806  | T                                                | G | 0.436 | K154T         | -               | -                                           | -     |   |
| 16 | <i>TOX3</i>     | 52484238  | G                                                | A | 0.186 | Q31L          | -               | -                                           | -     |   |
| 16 | <i>PSMB10</i>   | 67970188  | G                                                | C | 0.688 | R58G          | -               | COSM139019                                  | -     | - |
| 17 | <i>SHPK</i>     | 3524660   | CGGCGAT                                          | C | 0.444 | II30_Al31del  | -               | -                                           | -     |   |
| 19 | <i>RHPN2</i>    | 33490566  | T                                                | C | 0.212 | Q384R         | -               | -                                           | -     |   |
| 19 | <i>RHPN2</i>    | 33490585  | G                                                | A | 0.388 | Q378*         | rs78615454      | COSM1318333                                 | -     | - |
| 22 | <i>POTEH</i>    | 16287784  | C                                                | T | 0.268 | W34*          | rs20037519<br>0 | -                                           | 0.006 | - |
| 22 | <i>SRRD</i>     | 26879946  | GGAGGCGGC                                        | G | 0.160 | A133_A39del   | rs66831137      | -                                           | -     | - |

|                      |    |                |           | GCCCCGGGGG<br>AGA |   |       |        |                 |             |   |         |
|----------------------|----|----------------|-----------|-------------------|---|-------|--------|-----------------|-------------|---|---------|
|                      | X  | <i>SLC25A5</i> | 118604444 | G                 | C | 0.426 | R236P  | rs11441358<br>2 | -           | - |         |
| Breast AS            | 3  | <i>PIK3CA</i>  | 178916876 | G                 | A | 0.348 | R88Q   | rs12191328<br>7 | COSM746     | - |         |
|                      | 4  | <i>TRIM2</i>   | 154217059 | G                 | A | 0.656 | V461M  |                 |             | - | <0.0001 |
|                      | 5  | <i>EIF4E1B</i> | 176070736 | G                 | A | 0.655 |        |                 |             | - | <0.0001 |
|                      | 10 | <i>HPSE2</i>   | 100503738 | C                 | T | 0.258 | R229H  |                 |             | - | 0.00473 |
|                      | 11 | <i>TENM4</i>   | 78516508  | G                 | A | 0.288 | R670W  |                 |             | - | <0.0001 |
|                      | 11 | <i>CBL</i>     | 119148966 | T                 | G | 0.212 | C396G  |                 | COSM34074   | - |         |
|                      | 12 | <i>VWF</i>     | 6103147   | T                 | C | 0.214 | Y2160C |                 |             | - | <0.0001 |
|                      | 13 | <i>PARP4</i>   | 25021323  | A                 | G | 0.344 | I1039T | rs73172125      | COSM147647  | - | 0.347   |
|                      | 13 | <i>COL4A2</i>  | 111160303 | C                 | T | 0.256 | A1539V |                 |             | - | <0.0001 |
|                      | 15 | <i>CSPG4</i>   | 75982085  | C                 | T | 0.156 | E441K  | rs79463888      | COSM1317754 | - | 0.15    |
|                      | 20 | <i>BPIFB4</i>  | 31680303  | C                 | A | 0.128 | P395T  |                 |             | - |         |
|                      | 20 | <i>PLCG1</i>   | 39795452  | C                 | G | 0.434 | L752V  |                 |             | - |         |
|                      | 20 | <i>WFDC8</i>   | 44180670  | G                 | A | 0.344 | R241C  | rs14756052<br>2 | COSM1027261 | - | <0.0001 |
| Papillary<br>Thyroid | 3  | <i>RASSF1</i>  | 50369082  | C                 | T | 0.212 | R227H  |                 |             | - | <0.0001 |
|                      | 6  | <i>MDGA1</i>   | 37606032  | C                 | T | 0.234 | V909I  |                 | COSM1600157 | - | <0.0001 |
|                      | 6  | <i>ARID1B</i>  | 157528658 | G                 | A | 0.168 | R2168Q |                 |             | - | <0.0001 |
|                      | 7  | <i>BRAF</i>    | 140453136 | A                 | T | 0.324 | V600E  | rs11348802<br>2 | COSM476     | - | <0.0001 |
|                      | 17 | <i>PIK3R6</i>  | 8741894   | C                 | T | 0.254 | R59K   |                 |             | - |         |

**Table S2. Filtered variants found in the WES of F3 patient affected with CAS (*POT1* p.R117C carrier).**

| Chr   | Genomic     |           |          | REF | ALT   | Fraction                       | HGVS <sub>p</sub>      | Existing Variation | GMAF |
|-------|-------------|-----------|----------|-----|-------|--------------------------------|------------------------|--------------------|------|
|       | Gene Symbol | Position  | Position |     |       |                                |                        |                    |      |
| chr1  | KYAT3       | 88949093  | A        | T   | 0.128 | ENSP00000260508.4:p.Leu380Gln  | rs144984854            | 0.0006             |      |
| chr2  | ANKRD36     | 97211741  | G        | A   | 0.436 | ENSP00000391950.2:p.Val1157Met | rs10194525             |                    |      |
| chr6  | HLA-DRB1    | 32580249  | G        | C   | 0.310 | ENSP00000353099.5:p.Thr262Arg  |                        |                    |      |
| chr10 | EEF1AKM     | 124774782 | C        | T   | 0.168 | ENSP00000357829.2:p.Ala98Thr   | rs199727427            | 0.0006             |      |
| chr13 | PARP4       | 24447185  | A        | G   | 0.304 | ENSP00000371419.3:p.Ile1039Thr |                        |                    |      |
| chr17 | MYH13       | 10306461  | G        | A   | 0.344 | ENSP00000404570.3:p.Arg1822Trp | rs116935297            | 0.007              |      |
| chr17 | MAP2K3      | 21300875  | G        | T   | 0.456 | ENSP00000345083.4:p.Arg94Leu   | rs56067280             |                    |      |
| chr18 | ANKRD30B    | 14843024  | C        | G   | 0.478 | ENSP00000351875.4:p.Pro918Ala  | rs180690700            |                    |      |
| chr19 | COLGALT1    | 17560463  | C        | G   | 0.268 | ENSP00000252599.3:p.Leu163Val  | rs764429704            |                    |      |
| chr17 |             | 63491216  | C        | T   | 0.675 | ENSP00000464149.1:p.Thr342Met  | rs3730043              | 0.0034             |      |
| chr1  | VPS13D      | 12249234  | A        | C   | 0.677 | ENSP00000478104.1:p.Gln153His  | rs116415833            | 0.0018             |      |
| chr1  | FAM131C     | 16058547  | G        | A   | 0.104 | ENSP00000364814.4:p.Arg245Trp  | rs77667563             |                    |      |
| chr1  | CROCC       | 16940041  | G        | C   | 0.126 | ENSP00000364691.4:p.Asp586His  | rs9435714              |                    |      |
| chr1  | KDF1        | 26952098  | A        | G   | 0.456 | ENSP00000319179.5:p.Cys95Arg   | rs148853297            |                    |      |
| chr1  | PPCS        | 42456962  | A        | T   | 0.546 | ENSP00000361642.3:p.Arg133Trp  | rs199807362            |                    |      |
| chr1  | IPP         | 45716925  | G        | A   | 0.344 | ENSP00000379739.3:p.Arg427Cys  | rs142095376            | 0.0002             |      |
| chr1  | PODN        | 53078994  | G        | A   | 0.778 | ENSP00000308315.5:p.Arg543His  | rs61999355             | 0.003              |      |
| chr1  | FAM151A     | 54619889  | C        | G   | 0.128 | ENSP00000306888.2:p.Lys79Asn   | rs114883650            | 0.0144             |      |
| chr1  | RBMXL1      | 88983615  | C        | G   | 0.376 | ENSP00000446099.1:p.Gly71Ala   | rs111779380            |                    |      |
| chr1  | TSPAN2      | 115072962 | C        | G   | 0.201 | ENSP00000358529.2:p.Gly39Arg   | rs147800870            | 0.0004             |      |
| chr1  | PDE4DIP     | 149005208 | C        | T   | 0.567 | ENSP00000358363.4:p.Arg1396Trp | rs2798901              |                    |      |
| chr1  | FLG2        | 152351277 | G        | A   | 0.234 | ENSP00000373370.4:p.Ser2170Phe | rs201200591,COSM896166 |                    |      |
| chr1  | CRNN        | 152409620 | A        | G   | 0.198 | ENSP00000271835.3:p.Ser488Pro  |                        |                    |      |
| chr1  | GPA33       | 167068982 | C        | A   | 0.304 | ENSP00000356842.3:p.Val119Phe  | rs72689400             | 0.0058             |      |

|      |          |           |   |   |       |                                |                                                                                     |        |
|------|----------|-----------|---|---|-------|--------------------------------|-------------------------------------------------------------------------------------|--------|
| chr1 | KIF14    | 200592110 | T | G | 0.567 | ENSP00000356319.4:p.Lys928Thr  | rs150766596                                                                         |        |
| chr1 | PKP1     | 201322032 | G | A | 0.436 | ENSP00000263946.3:p.Glu489Lys  | rs748085816                                                                         |        |
|      |          |           |   |   |       |                                | rs142615706,COSM5042798,COSM5042797,COSM5042796,COSM3360727,COSM3360726,COSM3360725 | 0.0012 |
| chr1 | OBSCN    | 228350867 | C | G | 0.128 | ENSP00000455507.2:p.Arg7072Gly |                                                                                     |        |
| chr1 | RHOU     | 228743354 | G | A | 0.676 | ENSP00000355652.3:p.Val131Met  |                                                                                     |        |
| chr1 | EDARADD  | 236482309 | C | T | 0.398 | ENSP00000335076.4:p.Ser103Phe  | rs114632254,CM114961                                                                | 0.013  |
| chr1 | OR2T3    | 248473745 | G | A | 0.298 | ENSP00000352604.2:p.Cys132Tyr  | rs148025314                                                                         |        |
| chr1 | OR2T34   | 248573866 | G | A | 0.126 | ENSP00000330904.2:p.Arg298Cys  | rs148590921                                                                         |        |
| chr1 | OR2T27   | 248650526 | T | C | 1.000 | ENSP00000342008.3:p.Tyr120Cys  |                                                                                     |        |
| chr2 | MBOAT2   | 8873294   | C | T | 0.107 | ENSP00000302177.3:p.Val233Ile  | rs34573615                                                                          | 0.0142 |
| chr2 |          | 47087059  | C | A | 0.172 | ENSP00000408527.2:p.Met232Ile  | rs184422124                                                                         | 0.0008 |
| chr2 | ASB3     | 53765485  | G | C | 0.243 | ENSP00000263634.2:p.Leu30Val   | rs36020289                                                                          | 0.0056 |
| chr2 | TSPYL6   | 54255416  | G | A | 0.778 | ENSP00000417919.2:p.Arg246Cys  | rs17189743                                                                          | 0.0204 |
| chr2 | USP34    | 61278194  | G | A | 0.166 | ENSP00000381577.2:p.Pro1802Ser |                                                                                     |        |
| chr2 | ANKRD36C | 95944662  | T | A | 0.214 | ENSP00000403302.1:p.Asn486Tyr  | rs77220524                                                                          |        |
| chr2 | ASTL     | 96132701  | C | T | 0.463 | ENSP00000343674.2:p.Arg159His  | rs61735195                                                                          | 0.0066 |
| chr2 | NIFK     | 121732168 | C | T | 0.184 | ENSP00000285814.4:p.Glu94Lys   | rs751855520                                                                         |        |
| chr2 | LCT      | 135817693 | T | A | 0.564 | ENSP00000264162.2:p.Lys452Met  |                                                                                     |        |
| chr2 | LRP1B    | 140868259 | G | A | 0.804 | ENSP00000374135.3:p.Leu1392Phe | rs200955532,COSM1007053                                                             |        |
| chr2 | NMI      | 151275501 | G | A | 0.756 | ENSP00000243346.5:p.Thr206Met  | rs199573903                                                                         | 0.0002 |
| chr2 | SLC39A10 | 195716880 | A | G | 0.278 | ENSP00000386766.3:p.His647Arg  | rs755523552                                                                         |        |
| chr2 | TNS1     | 217882350 | A | C | 0.674 | ENSP00000171887.4:p.Ile311Met  | rs11680854                                                                          | 0.0104 |
| chr2 | ESPNL    | 238131340 | A | G | 0.201 | ENSP00000339115.3:p.Lys876Glu  | rs149541007                                                                         | 0.0062 |
| chr3 | FANCD2   | 10065867  | G | C | 0.436 | ENSP00000287647.3:p.Cys758Ser  | rs540805431                                                                         | 0.0002 |
| chr3 | TTC21A   | 39138609  | G | A | 0.678 | ENSP00000398211.2:p.Glu1291Lys | rs80238762                                                                          | 0.0058 |
| chr3 | DNAH1    | 52360039  | G | A | 0.322 | ENSP00000401514.2:p.Val1511Met | rs61734638                                                                          | 0.0084 |
| chr3 | ZNF717   | 75737092  | C | T | 0.128 | ENSP00000419377.1:p.Cys794Tyr  | rs139633377                                                                         |        |

|      |          |           |   |   |       |                                |                         |        |
|------|----------|-----------|---|---|-------|--------------------------------|-------------------------|--------|
| chr3 | ZNF717   | 75737101  | G | T | 0.201 | ENSP00000419377.1:p.Pro791His  | rs79138891              |        |
| chr3 | ZNF717   | 75737127  | A | C | 0.128 | ENSP00000419377.1:p.His782Gln  | rs79811623              |        |
| chr3 | ZNF717   | 75737622  | T | A | 0.344 | ENSP00000419377.1:p.Arg617Ser  | rs76175438              |        |
| chr3 | ZNF717   | 75737840  | C | T | 0.166 | ENSP00000419377.1:p.Glu545Lys  | rs76496075              |        |
| chr3 | ZNF717   | 75738575  | G | A | 0.236 | ENSP00000419377.1:p.Arg300Cys  | rs1962893               |        |
| chr3 | OR5K1    | 98469710  | T | C | 0.768 | ENSP00000373193.2:p.Leu45Ser   | rs200654905             | 0.003  |
| chr3 | BBX      | 107716685 | C | T | 0.924 | ENSP00000319974.8:p.Arg81Trp   | rs142400819             | 0.003  |
| chr3 | ARHGEF26 | 154225981 | C | G | 0.440 | ENSP00000348828.4:p.Asn687Lys  |                         |        |
| chr3 | GPR149   | 154428985 | G | C | 0.778 | ENSP00000374390.2:p.Pro211Ala  | rs774089990             |        |
| chr3 | MUC20    | 195726080 | G | C | 0.234 | ENSP00000414350.2:p.Asp493His  |                         |        |
| chr3 | MUC20    | 195729690 | C | G | 0.128 | ENSP00000414350.2:p.Ser671Cys  |                         |        |
| chr3 | MUC4     | 195762138 | C | A | 1.000 | ENSP00000417498.3:p.Ala4821Ser | CM066583                |        |
| chr3 | MUC4     | 195789859 | G | A | 0.184 | ENSP00000417498.3:p.Thr574Ile  |                         |        |
| chr4 | IDUA     | 987896    | C | G | 0.134 | ENSP00000247933.4:p.His82Gln   | rs148775298             | 0.0012 |
| chr4 | HTT      | 3207344   | G | A | 0.310 | ENSP00000347184.5:p.Gly2047Arg | rs181217572             | 0.0004 |
| chr4 | TLR1     | 38796634  | G | A | 0.780 | ENSP00000354932.2:p.Pro733Leu  | rs5743621               | 0.0126 |
| chr4 | KDR      | 55098758  | G | C | 0.654 | ENSP00000263923.4:p.Thr771Arg  | COSM94566,COSM4381082   |        |
| chr4 | UGT2B15  | 68670105  | T | G | 0.388 | ENSP00000341045.5:p.Ser172Arg  | rs200638397             | 0.0002 |
| chr4 | RUFY3    | 70806627  | C | G | 0.124 | ENSP00000370394.3:p.Leu611Val  | rs754675264             |        |
| chr4 | CCSER1   | 90308466  | G | C | 0.432 | ENSP00000425040.1:p.Ser61Thr   | rs184253075             | 0.0008 |
| chr4 | PDLIM5   | 94455353  | A | G | 0.567 | ENSP00000480359.1:p.Lys22Arg   | rs75841704              | 0.0078 |
| chr4 | UNC5C    | 95170263  | C | T | 0.128 | ENSP00000406022.1:p.Ala841Thr  | rs34585936              | 0.0184 |
| chr4 | QRFPR    | 121380442 | A | C | 0.214 | ENSP00000377948.2:p.Val69Gly   | rs34270076              | 0.0076 |
| chr4 | CBR4     | 169002197 | C | A | 0.678 | ENSP00000303525.3:p.Val137Phe  |                         |        |
| chr4 | CBR4     | 169002200 | T | A | 0.455 | ENSP00000303525.3:p.Ile136Phe  |                         |        |
| chr4 | TLR3     | 186084674 | C | A | 0.134 | ENSP00000296795.2:p.Ala839Asp  | rs201540925,COSM4584973 | 0.0002 |
| chr5 | SLC9A3   | 488354    | C | T | 0.436 | ENSP00000264938.3:p.Val213Ile  | rs143027124             |        |
| chr5 | C5orf49  | 7831902   | T | G | 0.166 | ENSP00000382708.2:p.Asn131Thr  |                         |        |

|      |          |           |   |   |       |                                |                                              |        |
|------|----------|-----------|---|---|-------|--------------------------------|----------------------------------------------|--------|
| chr5 | ADGRV1   | 90705420  | G | A | 0.124 | ENSP00000384582.2:p.Ala2803Thr | rs111033530                                  | 0.0048 |
| chr5 | MARCH3   | 126878360 | C | T | 0.356 | ENSP00000309141.5:p.Arg143Gln  | rs138413676                                  |        |
| chr5 | LECT2    | 135951324 | C | T | 0.304 | ENSP00000274507.1:p.Gly63Glu   | rs149560293                                  | 0.0068 |
| chr5 | PCDHGA6  | 141374360 | G | A | 0.256 | ENSP00000429601.1:p.Glu93Lys   | rs200765071                                  |        |
| chr5 | PCDH12   | 141945665 | C | T | 0.732 | ENSP00000231484.3:p.Gly1091Ser | rs779814208                                  |        |
| chr5 | SCGB3A2  | 147881560 | G | A | 0.652 | ENSP00000296694.4:p.Gly57Asp   | rs140599638                                  | 0.0004 |
| chr5 | SLC36A2  | 151343594 | C | A | 0.224 | ENSP00000334223.4:p.Gly87Val   | rs77010315,CM086960                          | 0.005  |
| chr5 | GFPT2    | 180301596 | T | C | 0.364 | ENSP00000253778.8:p.Arg673Gly  |                                              |        |
| chr6 | SOX4     | 21594616  | C | G | 0.578 | ENSP00000244745.1:p.Leu28Val   | rs140231408,COSM3697699                      | 0.0066 |
| chr6 | BTN2A2   | 26392401  | G | A | 0.576 | ENSP00000349143.4:p.Ala336Thr  | rs142803339,COSM3745097                      | 0.0092 |
|      |          |           |   |   |       |                                | CD994645,COSM5446135,COSM5446134,COSM4593407 |        |
| chr6 | HLA-A    | 29944253  | G | C | 0.168 | ENSP00000379873.1:p.Asp251His  |                                              |        |
| chr6 | PPP1R10  | 30609877  | C | G | 0.222 | ENSP00000365694.2:p.Gly23Ala   |                                              |        |
| chr6 | HLA-DRB1 | 32580779  | C | T | 0.128 | ENSP00000353099.5:p.Ala244Thr  | rs3830125                                    |        |
| chr6 | HLA-DRB1 | 32589669  | G | C | 0.201 | ENSP00000353099.5:p.Pro25Arg   | rs148093782                                  |        |
| chr6 | HLA-DQB2 | 32757848  | T | C | 0.344 | ENSP00000396330.2:p.Ser228Gly  | rs9276572                                    |        |
| chr6 | PPIL1    | 36871822  | C | G | 0.134 | ENSP00000362803.5:p.Cys36Ser   | rs12194408                                   | 0.0098 |
| chr6 | PTK7     | 43130655  | G | A | 0.276 | ENSP00000418754.1:p.Arg277His  | rs78949718                                   | 0.0028 |
| chr6 | POLR1C   | 43520104  | C | T | 0.128 | ENSP00000361465.3:p.Arg141Cys  | rs148385032                                  | 0.0014 |
| chr6 | DST      | 56552557  | C | T | 0.128 | ENSP00000307959.7:p.Gly3155Glu | rs775546048                                  |        |
| chr6 | TTK      | 80035318  | C | T | 0.166 | ENSP00000358813.2:p.Leu609Phe  | rs540538876                                  | 0.0002 |
| chr6 | PNRC1    | 89081009  | C | T | 0.124 | ENSP00000336931.3:p.Pro39Ser   | rs2231267                                    | 0.0056 |
| chr6 | ARMC2    | 108953073 | C | T | 0.278 | ENSP00000376417.4:p.Thr546Met  | rs61741720                                   | 0.0132 |
| chr6 | VNN1     | 132683243 | T | C | 0.128 | ENSP00000356905.4:p.Tyr480Cys  | rs567530094                                  | 0.0002 |
| chr6 | SHPRH    | 145922832 | G | A | 0.243 | ENSP00000356475.2:p.Arg1184Cys | rs148401398                                  | 0.0014 |
| chr7 | AMZ1     | 2709683   | G | T | 0.376 | ENSP00000308149.4:p.Cys272Phe  | rs148137749                                  | 0.0006 |
| chr7 | SDK1     | 3962743   | G | A | 0.455 | ENSP00000385899.2:p.Gly441Arg  | rs139796765                                  | 0.0058 |
| chr7 | TNRC18   | 5309293   | C | T | 0.677 | ENSP00000395538.1:p.Gly2822Arg | COSM3881739,COSM3881740                      |        |



|      |          |           |   |   |       |                                |                                     |        |
|------|----------|-----------|---|---|-------|--------------------------------|-------------------------------------|--------|
| chr7 | PSPH     | 56021118  | T | C | 0.295 | ENSP00000378854.3:p.Asp32Gly   |                                     |        |
| chr7 | GATAD1   | 92456449  | C | T | 0.184 | ENSP00000287957.3:p.Arg233Trp  | rs34768413                          | 0.007  |
| chr7 | FBXO24   | 100590263 | A | C | 0.128 | ENSP00000416558.2:p.Glu114Asp  | rs545357401                         | 0.0002 |
| chr7 | POT1     | 124863547 | G | A | 0.457 | ENSP00000350249.3:p.Arg117Cys  | rs780936436                         |        |
| chr7 | CPA2     | 130289628 | C | A | 0.335 | ENSP00000222481.4:p.Leu381Met  | rs146796996                         | 0.0012 |
| chr7 | TRBV20-1 | 142627134 | A | T | 0.310 | ENSP00000374917.3:p.Arg24Trp   |                                     |        |
| chr7 | PRSS1    | 142750558 | C | G | 0.436 | ENSP00000308720.7:p.Ala15Gly   | rs200665515,COSM3723223             |        |
| chr7 | PRSS1    | 142750660 | G | T | 0.567 | ENSP00000308720.7:p.Gly49Val   | rs138464021                         |        |
| chr7 | PRSS1    | 142750672 | T | A | 0.668 | ENSP00000308720.7:p.Ile53Asn   | rs149246646                         |        |
| chr7 | PRSS1    | 142752506 | G | T | 0.574 | ENSP00000308720.7:p.Gly177Val  |                                     |        |
| chr7 | SSPO     | 149802064 | C | T | 0.256 | ENSP00000485256.1:p.Ser2508Phe | rs140977594                         | 0.0056 |
| chr7 | KMT2C    | 152247922 | C | T | 0.446 | ENSP00000262189.6:p.Gly838Ser  | COSM4591270                         |        |
| chr7 | KMT2C    | 152265180 | C | T | 0.675 | ENSP00000262189.6:p.Asp348Asn  | rs201834857,COSM228110              |        |
| chr7 | VIPR2    | 159031954 | C | T | 0.788 | ENSP00000262178.2:p.Cys362Tyr  | rs147214125                         | 0.0004 |
| chr8 | SGCZ     | 14108196  | G | A | 0.476 | ENSP00000371512.1:p.Pro196Leu  | rs145213189                         | 0.0004 |
| chr8 | PDGFRL   | 17642653  | T | A | 0.324 | ENSP00000444211.1:p.Ile327Asn  | rs35346456                          | 0.0022 |
| chr8 | MTUS1    | 17653257  | C | G | 0.222 | ENSP00000262102.6:p.Glu1105Gln | rs61733705                          | 0.0066 |
| chr8 | MTUS1    | 17684434  | T | G | 0.166 | ENSP00000262102.6:p.Lys911Thr  | rs61748836                          | 0.0046 |
| chr8 | CYP7A1   | 58497114  | A | G | 0.436 | ENSP00000301645.3:p.Leu133Pro  |                                     |        |
| chr8 | CSPP1    | 67116017  | C | G | 0.657 | ENSP00000262210.5:p.Ser459Cys  | rs146431326                         | 0.0012 |
| chr8 | NBN      | 89971232  | G | A | 0.436 | ENSP00000265433.3:p.Arg215Trp  | rs34767364,CM044022                 | 0.001  |
| chr8 | PABPC1   | 100709584 | G | A | 0.566 | ENSP00000313007.5:p.Arg374Cys  | rs200409148                         |        |
| chr8 | PABPC1   | 100709589 | T | C | 0.534 | ENSP00000313007.5:p.Glu372Gly  | rs201076736                         |        |
| chr8 | PABPC1   | 100709611 | C | A | 0.128 | ENSP00000313007.5:p.Val365Leu  | rs202074479                         |        |
| chr8 | PABPC1   | 100717815 | G | C | 0.312 | ENSP00000313007.5:p.Ala154Gly  | rs113614781                         |        |
| chr8 | DEPTOR   | 119965343 | G | C | 0.122 | ENSP00000286234.5:p.Glu179Asp  | rs766410544                         |        |
| chr8 | PHF20L1  | 132832298 | G | A | 0.376 | ENSP00000378784.2:p.Arg603Gln  | rs184113048,COSM1196723,COSM1196724 | 0.003  |

|       |         |           |   |   |       |                                |                                                           |        |
|-------|---------|-----------|---|---|-------|--------------------------------|-----------------------------------------------------------|--------|
| chr9  | ADAMTSL | 18684733  | G | T | 0.184 | ENSP00000369921.4:p.Ala503Ser  | rs149221350,COSM3906436,COSM3906437                       | 0.0012 |
| chr9  | LINGO2  | 27949346  | A | C | 0.345 | ENSP00000369328.1:p.Ile442Met  |                                                           |        |
| chr9  | SHC3    | 89042122  | G | A | 0.304 | ENSP00000364995.4:p.Pro422Ser  | rs771704230,COSM24411                                     |        |
| chr9  | OR13C5  | 104599179 | G | A | 0.431 | ENSP00000363911.2:p.Pro79Ser   | rs7025570,COSM4163183                                     |        |
| chr9  | TRIM32  | 116698344 | G | A | 0.128 | ENSP00000408292.1:p.Arg201His  |                                                           |        |
| chr9  | LAMC3   | 131072789 | C | T | 0.655 | ENSP00000354360.4:p.Ser1124Phe | rs113259170                                               | 0.0032 |
| chr9  | GBGT1   | 133153893 | C | T | 0.756 | ENSP00000361110.3:p.Arg243His  | rs143563851,COSM4163479                                   | 0.001  |
| chr10 | CUBN    | 16890385  | G | A | 0.678 | ENSP00000367064.4:p.Ala2914Val | rs45551835,COSM32707                                      | 0.0064 |
| chr10 | NPY4R   | 46462341  | C | A | 0.234 | ENSP00000363431.1:p.Ala99Ser   |                                                           |        |
| chr10 | GPRIN2  | 46549695  | C | A | 0.112 | ENSP00000363436.1:p.Val348Leu  | rs4926046                                                 |        |
| chr10 | GPRIN2  | 46550133  | C | A | 0.324 | ENSP00000363436.1:p.Gly202Trp  | rs11204658                                                |        |
| chr10 | GPRIN2  | 46550598  | C | T | 0.436 | ENSP00000363436.1:p.Val47Met   |                                                           |        |
| chr10 | GPRIN2  | 46550622  | G | C | 0.234 | ENSP00000363436.1:p.Leu39Val   |                                                           |        |
| chr10 | LHPP    | 124517198 | G | A | 0.536 | ENSP00000357835.5:p.Asp215Asn  | rs140823928                                               | 0.0038 |
| chr10 | CTBP2   | 124994530 | G | A | 0.598 | ENSP00000311825.6:p.Ser780Phe  | rs374871777,COSM2021369,COSM2021368                       |        |
| chr10 | CTBP2   | 124994542 | C | T | 0.504 | ENSP00000311825.6:p.Ser776Asn  | rs78155918                                                |        |
| chr10 | CTBP2   | 124994563 | A | T | 0.544 | ENSP00000311825.6:p.Leu769Gln  | rs150320719                                               |        |
| chr10 | CTBP2   | 124994577 | C | A | 0.657 | ENSP00000311825.6:p.Gln764His  | rs80025996,COSM5764564,COSM5764563                        |        |
| chr10 | CTBP2   | 125002983 | T | G | 0.346 | ENSP00000311825.6:p.Asp652Ala  | rs796433756                                               |        |
| chr10 | CTBP2   | 125003006 | T | C | 0.310 | ENSP00000311825.6:p.Ile644Met  | rs112239066                                               |        |
| chr10 | CTBP2   | 125003010 | C | T | 0.215 | ENSP00000311825.6:p.Arg643Gln  | rs760489730,COSM5620576,COSM5620575                       |        |
| chr10 | CTBP2   | 125003036 | C | A | 0.166 | ENSP00000311825.6:p.Lys634Asn  | rs201760950,COSM4441587,COSM4441586                       |        |
| chr10 | CTBP2   | 125003065 | T | A | 0.184 | ENSP00000311825.6:p.Ile625Phe  | rs75794788,COSM4144456,COSM4144455                        |        |
| chr10 | CTBP2   | 125003091 | G | A | 0.345 | ENSP00000311825.6:p.Ala616Val  | rs3198935                                                 |        |
| chr10 | CTBP2   | 125003357 | G | A | 0.128 | ENSP00000311825.6:p.Thr605Met  | rs768573864,COSM2021395,COSM2021394                       |        |
| chr10 | CTBP2   | 125003368 | G | C | 0.267 | ENSP00000311825.6:p.Asp601Glu  | rs1058301,COSM5763526,COSM5763525,COSM4675296,COSM4675295 |        |

|       |           |           |   |   |       |                                |                                     |        |
|-------|-----------|-----------|---|---|-------|--------------------------------|-------------------------------------|--------|
| chr10 | CTBP2     | 125003410 | C | G | 0.215 | ENSP00000311825.6:p.Glu587Asp  | rs74705267,COSM4144460,COSM4144459  |        |
| chr10 | CTBP2     | 125003448 | G | C | 0.166 | ENSP00000311825.6:p.Leu575Val  | rs3198920                           |        |
| chr10 | CTBP2     | 125003450 | G | A | 0.376 | ENSP00000311825.6:p.Pro574Leu  | rs796256730,COSM5620578,COSM5620577 |        |
| chr10 | CTBP2     | 125003460 | G | T | 0.435 | ENSP00000311825.6:p.His571Asn  | rs796388243                         |        |
| chr10 | CTBP2     | 125003466 | G | T | 0.243 | ENSP00000311825.6:p.Pro569Thr  |                                     |        |
| chr10 | CTBP2     | 125003468 | C | A | 0.213 | ENSP00000311825.6:p.Gly568Val  | rs368195398                         |        |
| chr10 | CTBP2     | 125003470 | G | T | 0.178 | ENSP00000311825.6:p.Asn567Lys  | rs797010536                         |        |
| chr11 | MUC6      | 1016961   | G | A | 0.166 | ENSP00000406861.2:p.Thr1947Ile | rs773824783                         |        |
| chr11 | MUC6      | 1017069   | G | A | 0.801 | ENSP00000406861.2:p.Thr1911Met | rs80333708                          |        |
| chr11 | MUC6      | 1017135   | G | A | 0.726 | ENSP00000406861.2:p.Thr1889Ile | rs747429892                         |        |
| chr11 | MUC6      | 1017183   | G | T | 0.405 | ENSP00000406861.2:p.Pro1873Gln | rs34844844                          | 0.0004 |
| chr11 | MUC6      | 1017337   | T | C | 0.435 | ENSP00000406861.2:p.Thr1822Ala | rs76686156                          |        |
| chr11 | MUC6      | 1018042   | A | G | 0.235 | ENSP00000406861.2:p.Ser1587Pro | rs200364398                         |        |
| chr11 | MUC6      | 1018473   | A | T | 0.387 | ENSP00000406861.2:p.Leu1443His | rs112923701                         |        |
| chr11 | OR51J1    | 5403408   | C | T | 0.468 | ENSP00000332473.1:p.Ser271Phe  | rs183738872                         | 0.0008 |
| chr11 | SAA2-SAA4 | 18245916  | A | G | 0.234 | ENSP00000485552.1:p.Val75Ala   | rs71469388                          |        |
| chr11 | LRP4      | 46895950  | G | A | 0.435 | ENSP00000367888.1:p.Arg373Trp  | rs118009068                         | 0.0106 |
| chr11 | FOLH1     | 49186715  | G | A | 0.665 | ENSP00000256999.2:p.Arg190Trp  | rs75111588                          |        |
| chr11 | OR4C46    | 54603244  | C | T | 0.657 | ENSP00000329056.1:p.Cys252Tyr  | rs11246608                          |        |
| chr11 | OR4C46    | 54603280  | G | A | 0.879 | ENSP00000329056.1:p.Ser240Phe  | rs11246607                          |        |
| chr11 | OR9G1     | 56700722  | A | G | 0.342 | ENSP00000309012.1:p.Tyr112Cys  | rs4990194                           | 0.0056 |
| chr11 | OR9G1     | 56700892  | C | T | 0.210 | ENSP00000309012.1:p.Arg169Cys  | rs11228733                          | 0.0008 |
| chr11 | OR9G1     | 56701223  | T | A | 0.128 | ENSP00000309012.1:p.Val279Glu  | rs79251113                          |        |
| chr11 | ESRRA     | 64315848  | T | C | 0.184 | ENSP00000384851.1:p.Leu385Pro  | rs201072913                         |        |
| chr11 | ESRRA     | 64315856  | C | T | 0.376 | ENSP00000384851.1:p.Leu388Phe  | rs79204587                          |        |
| chr11 | ESRRA     | 64315859  | C | T | 0.435 | ENSP00000384851.1:p.Arg389Cys  | rs80310817                          |        |
| chr11 | ACTN3     | 66554587  | C | T | 0.231 | ENSP00000422007.1:p.Pro217Leu  | rs370740496                         |        |
| chr11 | NUMA1     | 72014043  | G | A | 0.435 | ENSP00000377298.3:p.Arg1154Trp | rs61740456                          | 0.001  |

|       |         |           |   |   |       |                                |                                    |        |
|-------|---------|-----------|---|---|-------|--------------------------------|------------------------------------|--------|
| chr11 | USP35   | 78210302  | G | A | 0.768 | ENSP00000431876.1:p.Arg816His  | rs75370284                         | 0.0128 |
| chr11 | TRIM49C | 90041372  | C | A | 0.465 | ENSP00000388299.1:p.Thr394Asn  | rs75119043,COSM3998623,COSM3998622 |        |
| chr11 | MAML2   | 96093510  | C | T | 0.376 | ENSP00000434552.1:p.Gly174Asp  | rs61749254                         | 0.0042 |
| chr11 | SORL1   | 121496918 | G | A | 0.346 | ENSP00000260197.6:p.Glu270Lys  | rs117260922                        | 0.0078 |
| chr11 | OR8B2   | 124382854 | G | A | 0.567 | ENSP00000364152.2:p.Leu164Phe  | rs886202                           |        |
| chr12 | WNK1    | 827047    | T | A | 0.234 | ENSP00000341292.5:p.Leu313Gln  |                                    |        |
| chr12 | FOXMI   | 2858912   | G | A | 0.128 | ENSP00000342307.2:p.Pro711Leu  | rs28919870                         | 0.0044 |
| chr12 | CRACR2A | 3696811   | A | C | 0.345 | ENSP00000409382.2:p.Asp63Glu   | rs144314920                        | 0.0004 |
| chr12 | KLRC2   | 10435931  | C | G | 0.376 | ENSP00000371327.2:p.Arg19Pro   | rs75545535                         |        |
| chr12 |         | 10435931  | C | G | 0.346 | ENSP00000437563.1:p.Arg19Pro   | rs75545535                         |        |
| chr12 | TAS2R19 | 11021703  | A | G | 0.205 | ENSP00000375091.2:p.Phe290Ser  |                                    |        |
| chr12 | TAS2R19 | 11021868  | A | C | 0.346 | ENSP00000375091.2:p.Leu235Arg  | rs763119571                        |        |
| chr12 | TAS2R31 | 11030522  | G | A | 0.145 | ENSP00000375093.2:p.Pro272Ser  | rs763119976                        |        |
| chr12 | TAS2R31 | 11031043  | A | G | 0.754 | ENSP00000375093.2:p.Leu98Pro   | rs73049067                         |        |
| chr12 | TAS2R31 | 11031194  | G | C | 0.304 | ENSP00000375093.2:p.Leu48Val   | rs760444623                        |        |
| chr12 | TAS2R30 | 11134103  | G | C | 0.166 | ENSP00000444736.1:p.Leu48Val   | rs113026132                        |        |
| chr12 | PTPRO   | 15503912  | C | G | 0.456 | ENSP00000281171.4:p.Asn370Lys  | rs61754411                         | 0.009  |
| chr12 | CCDC65  | 48918345  | A | G | 0.345 | ENSP00000312706.4:p.Gln227Arg  | rs149640178                        | 0.0004 |
| chr12 | TROAP   | 49331358  | G | A | 0.545 | ENSP00000257909.3:p.Arg748Gln  | rs200487146,COSM4921428            | 0.0006 |
| chr12 |         |           |   |   |       |                                | rs62638191,CM991095,RISN_RDH5:c    |        |
| chr12 | RDH5    | 55724028  | G | T | 0.787 | ENSP00000257895.5:p.Gly238Trp  | .712G>T                            | 0.0004 |
| chr12 | MDM1    | 68332236  | G | C | 0.456 | ENSP00000302537.7:p.Arg4Gly    | rs199537908                        |        |
| chr12 | LRRIQ1  | 85153046  | A | C | 0.476 | ENSP00000376910.2:p.Asp1481Ala | rs191782536                        | 0.0018 |
| chr12 | DNAH10  | 123916480 | C | A | 0.675 | ENSP00000489675.1:p.Asp3464Glu | rs61745785                         | 0.011  |
| chr13 | MPHOSPH | 19642121  | G | T | 0.778 | ENSP00000355388.4:p.Val74Phe   |                                    |        |
| chr13 | PARP4   | 24447125  | T | C | 0.368 | ENSP00000371419.3:p.Gln1059Arg | rs77269056                         |        |
| chr13 | PABPC3  | 25096638  | C | T | 0.215 | ENSP00000281589.3:p.Thr147Ile  | rs78432860                         |        |
| chr13 | PABPC3  | 25096659  | C | G | 0.567 | ENSP00000281589.3:p.Ala154Gly  | rs75760907                         |        |

|       |          |           |   |   |       |                                |                         |        |
|-------|----------|-----------|---|---|-------|--------------------------------|-------------------------|--------|
| chr13 | PABPC3   | 25096889  | A | G | 0.786 | ENSP00000281589.3:p.Lys231Glu  | rs78826513              |        |
| chr13 | PABPC3   | 25096951  | G | T | 0.745 | ENSP00000281589.3:p.Met251Ile  | rs75281454              |        |
| chr13 | PABPC3   | 25097154  | C | T | 0.564 | ENSP00000281589.3:p.Thr319Ile  | rs80261016              |        |
| chr13 | PABPC3   | 25097291  | G | T | 0.678 | ENSP00000281589.3:p.Val365Leu  | rs77466429              |        |
| chr13 | NEK5     | 52086336  | G | A | 0.124 | ENSP00000347767.4:p.Arg474Cys  | rs35465612              | 0.0042 |
| chr13 | SLC10A2  | 103049340 | G | A | 0.434 | ENSP00000245312.3:p.Pro290Ser  | rs56398830,CM952446     | 0.0074 |
| chr14 | WDR89    | 63599649  | A | T | 0.376 | ENSP00000378399.2:p.Asp98Glu   |                         |        |
| chr14 | WDR89    | 63599677  | C | T | 0.266 | ENSP00000378399.2:p.Cys89Tyr   | COSM5764373             |        |
| chr14 | WDR89    | 63599684  | A | G | 0.234 | ENSP00000378399.2:p.Ser87Pro   |                         |        |
| chr14 | SYNE2    | 64130105  | C | A | 0.340 | ENSP00000350719.3:p.Pro4733Thr | rs75568433              | 0.0028 |
| chr14 | VIPAS39  | 77453359  | C | T | 0.675 | ENSP00000452181.1:p.Val46Met   | rs148360332             | 0.0006 |
| chr14 | IGHV4-31 | 106349457 | G | T | 0.564 | ENSP00000395656.2:p.Pro61Gln   | rs77489245              |        |
| chr15 | NUTM1    | 34355873  | C | A | 0.567 | ENSP00000444896.1:p.Ser622Tyr  |                         |        |
| chr15 | TYRO3    | 41573327  | G | T | 0.254 | ENSP00000263798.3:p.Val669Leu  | rs62001448              |        |
| chr15 | SPATA5L1 | 45403247  | C | G | 1.000 | ENSP00000305494.6:p.Ser273Cys  | rs143453038,COSM4509821 | 0.01   |
| chr15 | SPATA5L1 | 45403421  | G | T | 0.654 | ENSP00000305494.6:p.Gly331Val  |                         |        |
| chr15 | SNX1     | 64136360  | G | A | 0.435 | ENSP00000261889.5:p.Asp466Asn  | rs1802376               | 0.0074 |
| chr15 | MYO9A    | 71968075  | T | C | 0.675 | ENSP00000348349.5:p.His632Arg  | rs552840125             | 0.0002 |
| chr16 | RPL3L    | 1947003   | C | T | 0.532 | ENSP00000268661.7:p.Val262Met  | rs113956264             | 0.0212 |
| chr16 | ACSM2A   | 20465673  | G | A | 0.345 | ENSP00000459451.1:p.Val112Met  |                         |        |
| chr16 | ACSM3    | 20775918  | T | C | 0.546 | ENSP00000289416.5:p.Leu100Pro  | rs5713                  | 0.004  |
| chr16 | OR16-13  | 33827483  | G | T | 0.180 | ENSP00000474814.1:p.Ala59Ser   | rs4077614               |        |
| chr16 | CES1     | 55828971  | C | A | 0.184 | ENSP00000353720.3:p.Gly19Val   | rs3826190               |        |
| chr16 | ZNF319   | 57996752  | C | A | 0.184 | ENSP00000299237.2:p.Arg505Leu  | rs149758697,COSM1191791 | 0.0002 |
| chr16 | AARS     | 70252728  | T | A | 0.215 | ENSP00000261772.7:p.Lys967Met  | rs35744709              | 0.0036 |
| chr16 | CLEC18B  | 74409592  | C | T | 0.304 | ENSP00000341051.5:p.Asp430Asn  |                         |        |
| chr16 | ZNF469   | 88437795  | G | C | 0.128 | ENSP00000402343.1:p.Arg3414Thr | rs199528724,COSM1380396 | 0.0018 |
| chr17 | ITGAE    | 3757758   | G | A | 0.166 | ENSP00000263087.4:p.Thr323Met  | rs71366574              | 0.0164 |

|       |           |          |   |   |       |                                |                        |        |
|-------|-----------|----------|---|---|-------|--------------------------------|------------------------|--------|
| chr17 | CTC1      | 8232058  | G | A | 0.678 | ENSP00000313759.8:p.Arg744Cys  |                        |        |
| chr17 | MYH13     | 10309647 | C | G | 0.456 | ENSP00000404570.3:p.Asp1614His | rs35069886             | 0.0068 |
| chr17 | MAP2K3    | 21300880 | C | T | 0.765 | ENSP00000345083.4:p.Arg96Trp   |                        |        |
| chr17 | MAP2K3    | 21304522 | C | T | 0.678 | ENSP00000345083.4:p.Thr222Met  | rs58609466             |        |
| chr17 | KCNJ12    | 21415757 | G | A | 0.234 | ENSP00000463778.1:p.Glu139Lys  | rs76265595             |        |
| chr17 | KCNJ12    | 21415775 | G | A | 0.345 | ENSP00000463778.1:p.Gly145Ser  | rs75029097             | 0.0002 |
| chr17 | KCNJ12    | 21416124 | G | A | 0.212 | ENSP00000463778.1:p.Arg261His  | rs77270326             |        |
| chr17 | KCNJ12    | 21416127 | T | G | 0.256 | ENSP00000463778.1:p.Ile262Ser  | rs76684759             |        |
| chr17 | KCNJ12    | 21416474 | G | A | 0.345 | ENSP00000463778.1:p.Glu378Lys  | rs78547883             |        |
| chr17 | SPAG5     | 28578086 | T | G | 0.348 | ENSP00000323300.5:p.Asn1145Thr | rs138772502            | 0.0014 |
| chr17 | KRTAP29-1 | 41302224 | A | T | 0.678 | ENSP00000375148.1:p.Cys210Ser  |                        |        |
| chr17 | KRT33B    | 41364890 | C | T | 0.486 | ENSP00000251646.3:p.Arg329His  |                        |        |
| chr17 | KRT33B    | 41369498 | C | T | 0.567 | ENSP00000251646.3:p.Glu85Lys   |                        |        |
| chr17 | ETV4      | 43528697 | G | A | 0.278 | ENSP00000321835.4:p.Ala426Val  | rs117364926            | 0.001  |
| chr17 | KANSL1    | 46171833 | T | G | 0.215 | ENSP00000387393.3:p.Lys104Thr  |                        |        |
| chr17 | EPN3      | 50536971 | C | T | 0.676 | ENSP00000268933.3:p.Arg139Trp  | rs371737517            | 0.0002 |
| chr17 | ACE       | 63491216 | C | T | 0.234 | ENSP00000290866.4:p.Thr916Met  | rs3730043              | 0.0034 |
| chr17 | CSH2      | 63872181 | T | C | 0.178 | ENSP00000376623.2:p.Glu200Gly  |                        |        |
| chr18 | PIEZO2    | 10671669 | C | T | 0.134 | ENSP00000421377.3:p.Arg2706Gln | rs189453524            | 0.0004 |
| chr18 | OSBPL1A   | 24167436 | A | G | 0.265 | ENSP00000320291.3:p.Ser810Pro  | rs35693789             | 0.0094 |
| chr19 | PODNL1    | 13934406 | C | T | 0.234 | ENSP00000345175.4:p.Val174Met  | rs781238470            |        |
| chr19 | PALM3     | 14053817 | C | T | 0.376 | ENSP00000344996.3:p.Asp604Asn  | rs75841596,COSM1390897 | 0.0116 |
| chr19 | WTIP      | 34482629 | C | T | 0.184 | ENSP00000466953.2:p.Arg219Trp  |                        |        |
| chr19 | ZNF599    | 34769537 | C | T | 0.180 | ENSP00000333802.6:p.Asp13Asn   | rs117610843            | 0.0058 |
| chr19 | CYP2A6    | 40848628 | A | T | 0.256 | ENSP00000301141.4:p.Leu160His  | rs1801272,CM980517     | 0.0092 |
| chr19 | PPP1R37   | 45144962 | C | T | 0.324 | ENSP00000221462.3:p.Leu366Phe  | rs146723120            | 0.003  |
| chr19 | NOP53     | 47745650 | G | C | 0.134 | ENSP00000246802.4:p.Asp31His   | rs78530808             | 0.0158 |
| chr19 | NTN5      | 48664274 | A | G | 0.102 | ENSP00000270235.3:p.Ile280Thr  | rs142533877            | 0.0056 |

|       |          |           |   |   |       |                                |                                                |        |
|-------|----------|-----------|---|---|-------|--------------------------------|------------------------------------------------|--------|
| chr19 | LILRB2   | 54279040  | G | A | 0.304 | ENSP00000375629.4:p.Leu243Phe  | COSM1326184                                    |        |
| chr19 | LILRA2   | 54574799  | C | A | 0.356 | ENSP00000251377.3:p.Leu141Ile  |                                                |        |
| chr19 | LILRA2   | 54575019  | A | G | 0.405 | ENSP00000251377.3:p.Glu214Gly  |                                                |        |
| chr19 | KIR2DL1  | 54773491  | C | A | 0.546 | ENSP00000336769.5:p.His77Asn   |                                                |        |
| chr19 | KIR2DL1  | 54773534  | C | A | 0.625 | ENSP00000336769.5:p.Thr91Lys   | COSM5712917,COSM5545196,COSM3404605            |        |
| chr19 | KIR2DL4  | 54804874  | A | G | 0.645 | ENSP00000339634.5:p.Tyr53Cys   |                                                |        |
| chr19 | KIR3DL1  | 54819832  | G | T | 0.654 | ENSP00000375608.4:p.Gly159Trp  |                                                |        |
| chr19 | KIR3DL2  | 54865893  | G | C | 0.564 | ENSP00000325525.3:p.Trp363Cys  |                                                |        |
| chr20 | PYGB     | 25276685  | T | C | 0.678 | ENSP00000216962.3:p.Tyr234His  |                                                |        |
| chr20 | ANKRD60  | 58218668  | G | A | 0.564 | ENSP00000396747.1:p.Pro289Ser  | rs41275658                                     | 0.002  |
| chr20 | LAMA5    | 62317394  | C | T | 0.304 | ENSP00000252999.3:p.Ala2488Thr | rs148169370                                    | 0.0048 |
| chr22 | IGLV5-45 | 22376251  | C | T | 0.234 | ENSP00000374831.2:p.Leu39Phe   |                                                |        |
| chr22 | GSTTP1   | 23998546  | C | A | 0.215 | ENSP00000492273.1:p.Arg241Met  |                                                |        |
| chr22 | GSTTP1   | 23998547  | T | A | 0.435 | ENSP00000492273.1:p.Arg241Trp  |                                                |        |
| chr22 | SUSD2    | 24183189  | G | T | 0.180 | ENSP00000351075.3:p.Gly70Val   | rs79232038                                     |        |
| chr22 | KIAA1671 | 25029315  | A | G | 0.376 | ENSP00000351207.3:p.Lys439Arg  |                                                |        |
| chr22 | CYP2D6   | 42127526  | C | T | 0.128 | ENSP00000353820.5:p.Arg365His  | rs1058172                                      |        |
| chr22 | CYP2D6   | 42130692  | G | A | 0.166 | ENSP00000353820.5:p.Pro34Ser   | CM900081                                       |        |
| chr22 | TUBGCP6  | 50221169  | C | T | 0.924 | ENSP00000248846.5:p.Gly1064Arg | rs149231425                                    | 0.0132 |
| chr22 | PLXNB2   | 50280899  | A | G | 0.184 | ENSP00000409171.1:p.Tyr1280His | COSM4444878                                    |        |
| chrX  | PAGE1    | 49689423  | T | C | 1.000 | ENSP00000365320.3:p.Glu138Gly  | rs151117508                                    | 0.0079 |
|       |          |           |   |   | 0.567 |                                | rs111638770,COSM5461083,COSM5461082,COSM388435 |        |
| chrX  | FAM104B  | 55146247  | G | C |       | ENSP00000397188.2:p.Pro63Arg   |                                                |        |
| chrX  | MED12    | 71119383  | C | G | 0.215 | ENSP00000363193.3:p.Thr37Arg   |                                                |        |
| chrX  | RTL9     | 110450737 | G | C | 1.000 | ENSP00000419786.2:p.Gln40His   | rs150383653,COSM4721270                        | 0.0003 |
| chrX  | SLC25A5  | 119469766 | G | A | 0.345 | ENSP00000360671.4:p.Gly73Ser   | rs143413528                                    |        |
| chrX  | SLC25A5  | 119469779 | A | C | 0.204 | ENSP00000360671.4:p.Asn77Thr   | rs148294496                                    |        |
| chrX  | SLC25A5  | 119469784 | A | T | 0.184 | ENSP00000360671.4:p.Ile79Phe   | rs141428607                                    |        |

chrX SLC25A5 119470481 G C 0.444 ENSP00000360671.4:p.Arg236Pro rs114413582

---



**Table S3. Mutations found in the WES for chromosome/telomere instability and the VEGF-angiogenesis pathway in sporadic CAS sequenced individuals (non-*POT1* mutation carriers).**

| Pathway                                          | Sample      | Gene           | Genomic position | Reference allele                 | Alternative allele | ALT Allelic fraction | Amino acid change | dbsnp       | MAF    |
|--------------------------------------------------|-------------|----------------|------------------|----------------------------------|--------------------|----------------------|-------------------|-------------|--------|
| Mutations involved in damage response and repair | NT1*        | <i>TP53BP2</i> | 223991119        | G                                | T                  | 0.213                | Q229K             | rs34683843  | 0.0467 |
|                                                  | NT2*        | <i>TP53BP1</i> | 43762077         | TGGGATAGG                        | TGG                | 0.205                | PI454-            |             |        |
|                                                  | NT3*        | <i>ATR</i>     | 142215368        | GGAAGTAA                         | -                  | 0.215                |                   |             |        |
|                                                  |             | <i>ATM</i>     | 108200982        | T                                | A                  | 0.166                | L2450*            |             |        |
|                                                  |             | <i>BRCA2</i>   | 32912956         | C                                | A                  | 0.166                | H1488Q            |             |        |
|                                                  | T1          | <i>BRCA1</i>   | 41245120         | T                                | A                  | 0.128                | N810Y             | rs28897682  |        |
|                                                  |             | <i>BRCA1</i>   | 41246481         | T                                | C                  | 0.257                | Q356R             | rs1799950   | 0.0279 |
|                                                  |             | <i>TP53</i>    | 7578503          | C                                | T                  | 0.451                | V143M             |             |        |
|                                                  |             | <i>TP53RK</i>  | 45315786         | C                                | T                  | 0.255                | R123Q             | rs34983477  | 0.0279 |
|                                                  |             | <i>APC2</i>    | 1457002          | G                                | C                  | 0.376                | G323R             | rs143870588 | 0.0119 |
|                                                  | T2          | <i>TP53BP2</i> | 223998162        | G                                | A                  | 0.201                | P115S             |             |        |
|                                                  | T3          | <i>BRCA1</i>   | 41245471         | C                                | T                  | 0.312                | D693N             | rs4986850   | 0.0398 |
|                                                  |             | <i>RAD51C</i>  | 56798128         | A                                | G                  | 0.255                | T287A             | rs28363317  | 0.0055 |
|                                                  |             | <i>ATM</i>     | 108165638        | TTTAGGAAAT<br>TAACCATTTT<br>CTCT | -                  | 0.423                | -1593             |             |        |
|                                                  |             | <i>CDK8</i>    | 26911760         | C                                | T                  | 0.310                | S62L              |             |        |
|                                                  |             | <i>BRIP1</i>   | 59861662         | C                                | A                  | 0.567                | V533L             |             |        |
|                                                  | T4          | <i>TP53</i>    | 7576876          | C                                | G                  | 0.346                | D324H             |             |        |
|                                                  |             | <i>TP53</i>    | 7578406          | C                                | T                  | 0.134                | R175H             | rs28934578  |        |
|                                                  |             | <i>RAD51B</i>  | 68331765         | A                                | T                  | 0.126                | M121L             | rs150928231 |        |
|                                                  |             | <i>RAD51B</i>  | 68352648         | T                                | G                  | 0.104                | L172W             | rs34094401  | 0.0188 |
|                                                  | <i>ATM</i>  | 108123551      | C                | T                                | 0.104              | P604S                | rs2227922         | 0.0032      |        |
|                                                  | <i>APC2</i> | 1468408        | C                | A                                | 0.376              | A1703E               | rs200444154       |             |        |
| NT2*;<br>T3                                      | <i>ATM</i>  | 108175462      | G                | A                                | 0-202              | D1853N               | rs1801516         | 0.0788      |        |

|                                          |                |                |             |           |       |        |             |             |            |
|------------------------------------------|----------------|----------------|-------------|-----------|-------|--------|-------------|-------------|------------|
| Mutations<br>involved in<br>Angiogenesis | NT1**          | <i>KDR</i>     | 55979558    | C         | T     | 0.184  | V297I       | rs2305948   | 0.1310     |
|                                          |                | <i>RASA2</i>   | 141326602   | T         | C     | 0.422  |             | rs295322    | 0.1140     |
|                                          |                | <i>DOCK1</i>   | 128810642   | C         | T     | 0.273  |             | rs9418773   | 0.1230     |
|                                          |                | <i>RICTOR</i>  | 38952300    | G         | A     | 0.179  | S1042L      |             |            |
|                                          |                | <i>IQGAP1</i>  | 90996087    | G         | A     | 0.189  | E415K       | rs200988874 | 0.0005     |
|                                          |                | <i>SRC</i>     | 36012590    | A         | G     | 0.304  | S12G        |             |            |
|                                          |                | <i>PIK3C2G</i> | 18691253    | C         | T     | 0.435  |             | rs12315010  | 0.0389     |
|                                          | NT2*           | <i>NRAS</i>    | 115256530   | G         | T     | 0.134  | Q61K        | rs121913254 |            |
|                                          |                | <i>PDPK1</i>   | 2607915     | CT        | C     | 0.310  | -79         |             |            |
|                                          |                | <i>RASA4</i>   | 102246366   | G         | A     | 0.124  | R123W       | rs139960113 | 0.0020     |
|                                          | NT3*           | <i>SHOX2</i>   | 157823580   | TACA      | T     | 0.556  | p.77_78del  |             |            |
|                                          |                | T1             | <i>NRG2</i> | 139231255 | C     | T      | 0.345       | R577H       | rs75431091 |
|                                          | <i>SPTAN1</i>  |                | 131367372   | A         | G     | 0.204  | N1260S      |             |            |
|                                          | <i>FGF22</i>   |                | 640065      | C         | T     | 0.256  | S47F        |             |            |
|                                          | T2             | <i>PIK3C2G</i> | 18443809    | C         | A     | 0.107  | A261E       | rs7133666   | 0.0417     |
|                                          |                | <i>RASA2</i>   | 141299289   | G         | A     | 0.172  | S557N       |             |            |
|                                          |                | <i>MAP2K1</i>  | 66736993    | G         | T     | 0.243  |             |             |            |
|                                          |                | <i>IQGAP1</i>  | 91025227    | T         | G     | 0.435  | L1122R      |             |            |
|                                          |                | <i>VAV3</i>    | 108145045   | C         | T     | 0.172  | E732K       |             |            |
|                                          |                | <i>DUSP8</i>   | 1579018     | T         | C     | 0.234  |             | rs113161544 | 0.0640     |
|                                          |                | <i>PIK3C2G</i> | 18473929    | C         | T     | 0.432  | Q391*       |             |            |
|                                          | T3             | <i>RASA2</i>   | 141328901   | G         | A     | 0.134  | G839R       |             |            |
|                                          |                | <i>PLCG1</i>   | 39792063    | A         | G     | 0.345  | S279G       | rs2228246   | 0.0952     |
|                                          |                | <i>RICTOR</i>  | 38960053    | C         | T     | 0.180  | V627I       |             |            |
|                                          |                | <i>DUSP8</i>   | 1579506     | A         | G     | 0.172  |             |             |            |
|                                          |                | <i>RASA4</i>   | 102235804   | G         | A     | 0.102  | T340I       |             |            |
|                                          |                | <i>RASA4</i>   | 102246393   | C         | T     | 0.165  | E114K       |             |            |
|                                          |                | <i>ITGAV</i>   | 187540655   | G         | A     | 0.184  |             |             |            |
| T4                                       | <i>PTPRQ</i>   | 81004265       | A           | C         | 0.436 | E1589D |             |             |            |
|                                          | <i>PIK3C2G</i> | 18656259       | C           | T         | 0.174 | H1021Y | rs201569993 | 0.0006      |            |

|            |               |           |   |   |       |        |             |
|------------|---------------|-----------|---|---|-------|--------|-------------|
|            | <i>PRKCQ</i>  | 6498721   | G | A | 0.102 | A521V  |             |
| T1; T3; T4 | <i>SPTANI</i> | 131377915 | G | A | 0.304 | R1718H |             |
| T3; NT1*   | <i>MAP2K1</i> | 66777404  | C | T | 0.174 | A257V  |             |
| T4; NT2*   | <i>VEGFA</i>  | 43738526  | C | G | 0.184 | A28G   | rs201786558 |

---

\* Confirmed constitutional \*\* Confirmed somatic.

**Table S4. Actionable variants found in the sequencing experiment with IBM Watson for Genomics platform for T1 patient.**

| <b>Gene</b>   | <b>Actionable variant</b> | <b>Variant evidence (Pubmed)</b> | <b>FDA-approved drug for Angiosarcoma</b> | <b>Other molecules with clinical evidence (NCT)</b>    |
|---------------|---------------------------|----------------------------------|-------------------------------------------|--------------------------------------------------------|
| <i>MSH6</i>   | p.Glu1088fs               | 12019211                         | Pembrolizunab                             | Nivolumab (NCT0366819)                                 |
| <i>TP53</i>   | p.Arg175His               | 8510927; 17401432                | -                                         | Adavosertib (NCT01827384)<br>Transferrin (NCT02354547) |
| <i>ARID1A</i> | p.Pro21del                | 23097632                         | -                                         | **                                                     |
| <i>ATR</i>    | p.Ile774fs                | 22960745                         | -                                         | **                                                     |
| <i>NOTCH</i>  | p.Pro2415del              | 15472975*; 25564152*             | -                                         | **                                                     |

NCT: Number of Clinical Trial

\* Similar variant within the same domain.

\*\* Compelling preclinical evidence and/or case study reports support the biomarker as being predictive of response to this drug

**Table S5. Actionable variants found in the sequencing experiment with IBM Watson for Genomics platform for T4 patient.**

| <b>Gene</b>  | <b>Actionable variant</b> | <b>Variant evidence (Pubmed)</b> | <b>FDA-approved drug for Angiosarcoma</b> | <b>Other molecules with clinical evidence (NCT)</b>                         |
|--------------|---------------------------|----------------------------------|-------------------------------------------|-----------------------------------------------------------------------------|
| <i>CDK2A</i> | p.Arg99Pro                | 20340136; 19260062               | -                                         | Palbociclib (NCT03239015)                                                   |
| <i>TP53</i>  | p.Val143Met               | 23469205                         | -                                         | Adavosertib (NCT01827384)<br>Transferrin (NCT02354547)                      |
| <i>KIT</i>   | Amplification             | 21523721; 17189383; 16166280     | Pazopanib (NCT01462630)*                  | Pazopanib (NCT03628131)<br>Imatinib (NCT02461849)<br>Nilotinib (NC02379416) |

NCT: Number of Clinical Trial

\* Phase II study
